# Supplementary material
Source: PubMed Central journal article supplement (PMC10681685)
Supplement: Janeczek_supp.pdf [file Janeczek_supp.pdf]

## **Supplemental materials for**

Emeryk A, Derom E, Janeczek K, et al. Home monitoring of asthma exacerbations in children and adults with use of an AI-aided stethoscope. *Ann Fam Med.* 2023;21(6):517-525.

## FAST TRACK - ZGODA UCZESTNIKA BADANIA

1. Adres e-mail:

---

2. Imię i nazwisko uczestnika Projektu

*(W przypadku uczestnika małoletniego, rodzic/opiekun podaje dane osobowe dziecka).*

---

3. Zdiagnozowana choroba *(Zaznacz tylko jedną odpowiedź):*

- astma
- mukowiscydoza
- POChP
- pacjent zdrowy – brak chorób przewlekłych układu oddechowego
- COVID-19

4. Data urodzenia uczestnika projektu:

---

5. Zgoda na udział w badaniu

*(Akceptacja jest dobrowolna, jednak jej brak uniemożliwia udział w Programie).*

- **Wyrażam pełną, świadomą i dobrowolną zgodę na udział w badaniu** realizowanego w ramach projektu “Udoskonalenie systemu StethoMe poprzez wdrożenie personalizowanego indeksu oddechowego (PRI) do monitorowania funkcjonowania układu oddechowego oraz podsystemu wspomagającego decyzję i selekcję pacjentów”, w którym będzie wykorzystywana metoda osłuchiwania układu oddechowego z użyciem stetoskopu elektronicznego, aplikacji StethoMe oraz algorytmów sztucznej inteligencji StethoMe® AI na potrzeby monitorowania choroby układu oddechowego i/lub prawidłowego stanu zdrowia oraz na zbieranie (nagrywanie) dźwięków osłuchowych z płuc, którym towarzyszyć będzie wypełnienie kwestionariuszy oceny. Jestem świadomy(a), że badania za pomocą stetoskopu są metodą powszechnie stosowaną, bezinwazyjną i bezpieczną.
- **Rozumiem i akceptuję zapis udostępnionego mi regulaminu** udziału w Projekcie, który definiuje zakres powierzonych mi zadań oraz płynących z tego tytułu korzyści oraz zobowiązuję się do jego przestrzegania.  
W przypadku późniejszych dodatkowych pytań, mogę się skontaktować z koordynatorem projektu ze strony StethoMe - dr Dorotą Bednarek lub mgr Anną Pastusiak (badania@stethome.com).
- **Jestem świadomy(a) przysługującego prawa do odstąpienia od udziału w badaniu na każdym jego etapie, bez podania przyczyny.**

**Zaznacz tylko jedną odpowiedź:**

- POTWIERDZAM
- NIE POTWIERDZAM

W przypadku uczestników niepełnoletnich:

- **Wyrażam pełną, świadomą i dobrowolną zgodę na udział reprezentowanego przeze mnie małoletniego w badaniu** realizowanego w ramach projektu “Udoskonalenie systemu StethoMe poprzez wdrożenie personalizowanego indeksu oddechowego (PRI) do monitorowania funkcjonowania układu oddechowego oraz podsystemu wspomagającego decyzję i selekcję pacjentów”, w którym będzie wykorzystywana metoda osłuchiwania układu oddechowego z użyciem stetoskopu elektronicznego, aplikacji StethoMe oraz algorytmów sztucznej inteligencji StethoMe® AI na potrzeby monitorowania choroby układu oddechowego i/lub prawidłowego stanu zdrowia oraz na zbieranie (nagrywanie) dźwięków osłuchowych z płuc, którym towarzyszyć będzie wypełnienie kwestionariuszy oceny. Jestem świadomy(a), że badania za pomocą stetoskopu są metodą powszechnie stosowaną, bezinwazyjną i bezpieczną.
- **Rozumiem i akceptuję zapis udostępnionego mi regulaminu** udziału małoletniego w Projekcie, który definiuje zakres powierzonych mi zadań oraz płynących z tego tytułu korzyści oraz zobowiązuję się do jego przestrzegania.  
W przypadku późniejszych dodatkowych pytań, mogę się skontaktować z koordynatorem projektu ze strony StethoMe - dr Dorotą Bednarek lub mgr Anną Pastusiak (badania@stethome.com).
- **Jestem świadomy(a) przysługującego prawa do odstąpienia od udziału w badaniu na każdym jego etapie, bez podania przyczyny.**

**Zaznacz tylko jedną odpowiedź:**

- POTWIERDZAM
- NIE POTWIERDZAM

## 6. Obowiązek informacyjny:

Informujemy, że:

1. Administratorem Pani/Pana danych osobowych jest StethoMe sp. z o.o. z siedzibą w Poznaniu przy ul. Winogrody 18A, KRS 0000558650, NIP 7831726542, REGON 361535342.
2. W przypadku jakichkolwiek pytań związanych z przetwarzaniem danych osobowych zachęcamy do kontaktu poprzez adres mailowy: info@StethoMe.com oraz pisemnie na adres naszej siedziby.
3. Pani/Pana dane osobowe będą przetwarzane celu udziału w badaniach naukowych prowadzonych przez StethoMe sp. z o.o. na podstawie udzielonej zgody, o której mowa w art. 6 ust. 1 lit. A Rozporządzenia Parlamentu Europejskiego i Rady (UE) 2016/679.
4. Pani/Pana dane osobowe nie będą przetwarzane w sposób zautomatyzowany, w tym również w formie profilowania.
5. Pani/Pana dane osobowe przechowywane będą do momentu wycofania zgody. Zgoda na przetwarzanie danych osobowych może zostać wycofana w dowolnym momencie drogą elektroniczną na adres: info@StethoMe.com. Wycofanie zgody nie wpływa na zgodność z prawem przetwarzania, którego dokonano na podstawie zgody przed jej wycofaniem.
6. Brak zgody na wykorzystanie danych osobowych we wskazanym celu nie niesie ze sobą żadnych negatywnych konsekwencji, ponieważ ma charakter całkowicie dobrowolny.
7. Odbiorcami Pani/Pana danych mogą być uprawnione instytucje na podstawie obowiązujących przepisów prawa.
8. Ma Pani/Pan prawo do żądania dostępu do swoich danych osobowych, ich sprostowania, usunięcia lub ograniczenia przetwarzania, prawo do wniesienia sprzeciwu wobec przetwarzania, a także prawo do przenoszenia danych.
9. Informujemy, że przysługuje Państwu prawo wniesienia skargi do organu nadzorczego jakim jest Prezes Urzędu Ochrony Danych Osobowych.

Zapoznaj się z naszą Polityką Prywatności.

**Zaznacz tylko jedną odpowiedź:**

- ZAPOZNAŁAM/ZAPOZNAŁEM SIĘ

**7. Zgoda na przetwarzanie danych osobowych:**

1. Administratorem danych osobowych Uczestników jest StethoMe sp. z o.o. z siedzibą: ul. Winogrody 18a, 61-663 Poznań, NIP: PL 783 172 65 42, Regon: 361 535 342, KRS: 00 00 558 650
2. Administrator zabezpiecza dane w związku z Programem z zachowaniem należytej staranności, stosownie do posiadanej wiedzy, doświadczenia oraz środków technicznych.
3. Dostęp do profilu Uczestnika w Programie zabezpieczony jest nazwą Uczestnika oraz hasłem Uczestnika. Uczestnik powinien dbać o poufność tych danych oraz dokonywać cyklicznych zmian hasła Uczestnika.
4. Dane osobowe będą wykorzystywane wyłącznie na potrzeby Programu chyba, że użytkownik w momencie rejestracji wyrazi zgodę na kontakt w przyszłości.
5. Podstawą przetwarzania przez StethoMe sp. z o.o. danych Uczestników w zakresie: adres e-mail, imię, nazwisko jest niezbędność wykonania Programu oraz umowy (art. 6 ust. 1 lit. b RODO) oraz prawnie uzasadniony interes StethoMe sp. z o.o. lub podmiotu trzeciego (art. 6 ust. 1 lit. f RODO). Przetwarzanie tych danych następuje w celach realizacji Programu oraz świadczenia usługi.
6. Dane dotyczące zdrowia Uczestników (waga, wzrost, choroby przewlekłe, nagrania dźwięków osłuchowych, wyniki testów, przyjmowane leki) są przetwarzane za zgodą Uczestnika (art. 9 ust. 2 lit. a RODO) – Uczestnik wyraża zgodę poprzez podpisanie oświadczenia o wyrażeniu zgody na przetwarzanie danych osobowych. Na żądanie Uczestnika StethoMe może wygenerować raport z Programu w oparciu o zebrane informacje i dane – Uczestnik może dzielić się raportem z wybranymi przez siebie osobami.
7. Odbiorcami danych są: Dane nie będą przekazywane innym podmiotom poza wskazanymi powyżej.
8. Dane osobowe, w tym dane zdrowotne, będą przetwarzane przez czas niezbędny do realizacji Programu. Dane osobowe zwykle przetwarzane na podstawie zgody będą przetwarzane do momentu cofnięcia zgody.
9. Uczestnik posiada:
  - prawo żądania dostępu do danych, które dotyczą danego Uczestnika, ich sprostowania, usunięcia lub ograniczenia przetwarzania,
  - prawo do wniesienia sprzeciwu wobec przetwarzania oraz prawo do przenoszenia danych;
  - uprawnienie do cofnięcia zgody udzielonej na przetwarzanie danych (bez wpływu na zgodność z prawem przetwarzania, którego dokonano na podstawie zgody przed jej cofnięciem),
  - prawo do wniesienia skargi do organu nadzorczego właściwego do spraw ochrony danych osobowych.
10. Podanie przez Uczestnika danych osobowych jest dobrowolne, jednak jego brak uniemożliwia udział w Programie.
11. Uczestnikowi przysługuje prawo wniesienia sprzeciwu do organu nadzoru jakim jest Prezes Urzędu Ochrony Danych Osobowych
12. Zapoznaj się z naszą Polityką Prywatności.  
Rezygnując z uczestnictwa w programie badawczym, możesz jednocześnie cofnąć zgodę na przetwarzanie danych osobowych. Jeśli tej zgody nie cofniesz będziemy Cię informować o przyszłych programach badawczych.

**Zaznacz tylko jedną odpowiedź:**

- ZAPOZNAŁAM/ZAPOZNAŁEM SIĘ

8. Prosimy o podanie adresu, pod który ma być wysłany stetoskop StethoMe. (*Gdy tylko stetoskop zostanie wysłany, otrzyma Pani/Pan powiadomienie*)

---

9. Ulica, numer domu:

---

10. Kod pocztowy:

---

11. Miejscowość:

---

12. Nazwisko lekarza, od którego dowiedział(a) się Pani/Pan o programie (*opcjonalnie*)

---

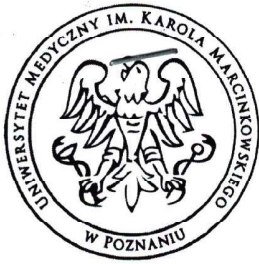

UNIwersytet Medyczny im. Karola Marcinkowskiego w Poznaniu

Komisja Bioetyczna przy Uniwersytecie Medycznym  
im. Karola Marcinkowskiego w Poznaniu

Collegium Stomatologicum  
ul. Bukowska 70  
60-812 Poznań

tel. (+48 61) 854 73 36  
www.bioetyka.ump.edu.pl

**Uchwała nr 961/21**

Na podstawie przepisów Ustawy z dnia 5 grudnia 1996 r. o zawodach lekarza i lekarza dentystry (tj. z dnia 28 lutego 2020 r., Dz.U. z 2020 r. poz. 514)z późn. zm.); Rozporządzenia Ministra Zdrowia i Opieki Społecznej z dnia 11 maja 1999 r. w sprawie szczegółowych zasad powoływania i finansowania oraz trybu działania komisji bioetycznych (Dz. U. z 1999 r., Nr 47, poz. 480); Rozporządzenia Ministra Finansów, Funduszy i Polityki Regionalnej z dnia 30.12.2020r. w sprawie obowiązkowego ubezpieczenia odpowiedzialności cywilnej podmiotu przeprowadzającego eksperyment medyczny (Dz.U. z 2020r. poz.2412); Ustawy z dnia 6 września 2001 r. Prawo farmaceutyczne (tj. z dnia 15 maja 2020 r. (Dz.U. z 2020 r. poz. 944)z późn. zm.); Rozporządzenia Ministra Finansów z dnia 30 kwietnia 2004 r. w sprawie obowiązkowego ubezpieczenia odpowiedzialności cywilnej badacza i sponsora (Dz. U. z 2004 Nr 101, poz. 1034 z późn. zm.); Rozporządzenia Ministra Zdrowia z dnia 30 kwietnia 2004 r. w sprawie sposobu prowadzenia badań klinicznych z udziałem małoletnich (Dz. U. z 2004 r. Nr 104, poz. 1108); Rozporządzenia Ministra Zdrowia z dnia 17 lutego 2016 r. w sprawie wzorów wniosków związanych z badaniem klinicznym wyrobu medycznego lub aktywnego wyrobu medycznego do implantacji oraz wysokości opłat za złożenie tych wniosków (Dz. U. z 2016 r., poz. 208); Ustawy z dnia 20 maja 2010 r. o wyrobach medycznych (tj. z dnia 13 grudnia 2019 r., Dz.U. z 2020 r. poz. 186), z późn. zm.); Rozporządzenie Ministra Finansów z dnia 6 października 2010 r. w sprawie obowiązkowego ubezpieczenia odpowiedzialności cywilnej sponsora i badacza klinicznego w związku z prowadzeniem badania klinicznego wyrobów (Dz. U. z 2010 r. Nr 194, poz. 1290); Ustawy z dnia 18 marca 2011 r. o Urzędzie Rejestracji Produktów Leczniczych, Wyrobów Medycznych i Produktów Biobójczych (tj. tj. z dnia 4 maja 2020 r., Dz.U. z 2020 r. poz. 836) z późn. zm.); Rozporządzenia Ministra Zdrowia z dnia 2 maja 2012 r. w sprawie Dobrej Praktyki Klinicznej (Dz. U. z 2012 r., poz. 489); Rozporządzenia Ministra Zdrowia z dnia 12 października 2018 r. w sprawie wzorów dokumentów przedkładanych w związku z badaniem klinicznym produktu leczniczego oraz opłat za złożenie wniosku o rozpoczęcie badania klinicznego (Dz. U. z 2018 r., poz. 1994); w oparciu o Deklarację Helsińską Światowego Stowarzyszenia Lekarzy (WMA - World Medical Association) - Etyczne zasady prowadzenia badań medycznych Z udziałem ludzi oraz przepisów ICH GCP.

**Komisja Bioetyczna, na posiedzeniu w dniu 09 grudnia 2021 r.**

**rozpatrzyła wniosek dotyczący prowadzenia eksperymentu badawczego.**

**Kierownik projektu i główny badacz:**

**dr n. med. Agnieszka Cwalińska**

**Miejsce prowadzenia badań:**

**Klinika Chorób Zakaźnych i Neurologii Dziecięcej  
Uniwersytetu Medycznego w Poznaniu**

**Członkowie zespołu**

**badawczego:**

**dr hab. n. biofiz. prof. UAM Jędrzej Kociński  
dr n. biofiz. Honorata Hafke-Dys  
dr n. biol. Dorota Bednarek**

**Temat badań:**

**„Udoskonalenie systemu StethoMe przez wdrożenie personalizowanego indeksu oddechowego (PRI) do monitorowania funkcjonowania układu oddechowego oraz podsystemu wspomagającego decyzję i selekcję pacjentów”.**

**Okres prowadzenia badań: grudzień 2021 r. – grudzień 2022 r.**

**Komisja wydała uchwałę o pozytywnym zaopiniowaniu tego wniosku**

Przewodniczący Komisji

*M. Urawajski*

Supplemental Figure 1. An exemplary panel used by physicians to describe each examination.

Examination: 14.02.2022, 17:56

**Moderate exacerbation**

Pulse: 106 bpm  
Respiratory rate: 22/min.  
Inspiration/expiration ratio: 1/2.02

Breathing: Very good  
Reliever: 14.02.2022, 07:30, ventolin

Doctor's evaluation

Auscultation assessment: Significant abnormalities in auscultation sounds an...

Exacerbation severity: Moderate exacerbation

Suspected pneumonia  
 Suspected bronchitis  
 Other (Describe in comments field)

Disease symptoms

- Coughing
- Wheezing

Temperature: 36.5°C  
Blood saturation: 100%  
PEF Value: 100 l/min.

Analysis of point 2

Wheezes (0-100): 6  
Rhonchi (0-100): 0  
Coarse crackles (0-100): 0  
Fine crackles (0-100): 0

1 2 3 4 5 6 7 8 9 10 11

expiration inspiration expiration inspiration expiration inspiration expiration

wheezes  
rhonchi  
coarse crackles  
fine crackles  
noise
